# Supplementary material for: On the viability of cyclometalated Ru(ii) complexes as dyes in DSSC regulated by COOH group, a DFT study
Source: Royal Society of Chemistry journal article supplement (doi:10.1039/c0cp01556c), 2010-11-23
Supplement: c0cp01556c.pdf [file c0cp01556c.pdf]

# On the Viability of Cyclometalated Ru(II) Complexes as Dyes in DSSC Regulated by COOH Group, A DFT Study

Jian Wang,<sup>a</sup> Bao-Hui Xia,<sup>\* a,b</sup> Fu-Quan Bai,<sup>a</sup> Lu Feng,<sup>a</sup> Hong-Xing Zhang,<sup>\* a</sup> and Qing-Jiang Pan<sup>c</sup>

<sup>a</sup> State Key Laboratory of Theoretical & Computational Chemistry, Institute of Theoretical Chemistry, Jilin University, Changchun 130023, People's Republic of China.

<sup>b</sup> College of Chemistry, Jilin University, Changchun 130000, People's Republic of China.

<sup>c</sup> Key Laboratory of Functional Inorganic Material Chemistry of Education Ministry & Laboratory of Physical Chemistry, School of Chemistry & Materials Science, Heilongjiang University, Harbin 150080, China

\* Correspondence to:

zhanghx@mail.jlu.edu.cn (Hong-Xing Zhang)

bhxia@jlu.edu.cn (Bao-Hui Xia)

## Supplementary Information

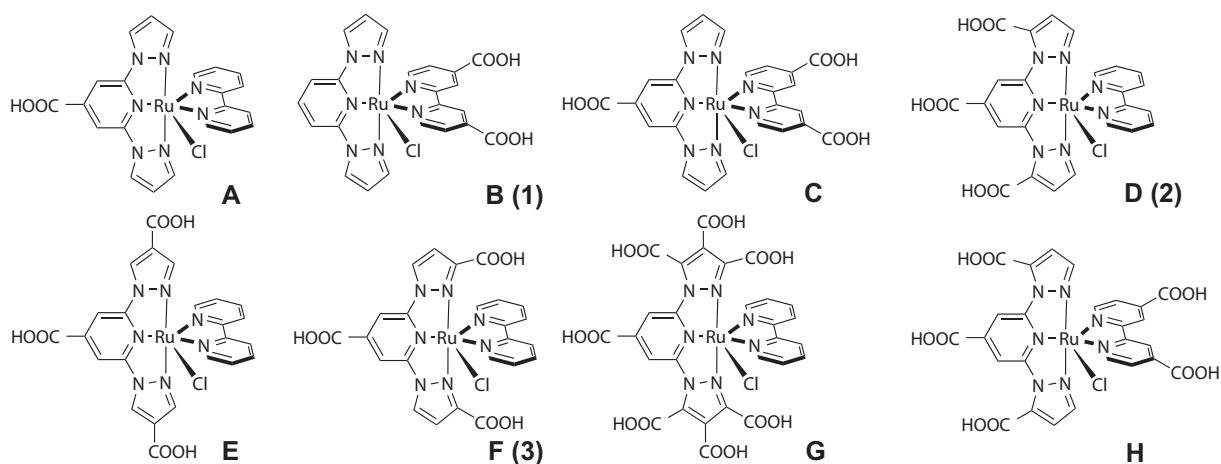

**Figure ESI-1** The possible conformations been tested in current investigation.

## 1 The Possible Conformations

All possible conformations been tested in the current investigation are listed in Figure ESI-1. Note that the “possible conformation” mentioned here are related to those could exist from the perspective of computational chemistry, rather than that of all possible structures from a point view of mathematica. The screening procedure based on the following two facts: more absorption peaks and higher driving force as compared with the experimentally explored complex **1**. The screening details are also described in detail in the text.

## 2 FMO Data

For **1**, the resultant 4d composition from the population analysis is 67.2% for HOMO, 66.5% for HOMO - 1 and 68.6% for HOMO - 2. While HOMO - 6 is localized on the bpy ligand. The character of the virtual orbitals are complicated. LUMO + 3 is dominated by bpy ligand. LUMO and LUMO +1 are contributed from p-orbital of COOH groups while the LUMO + 7 is characterized as 4d(Ru) perturbed by bpy and bpp ligands.

For **2**, the listed virtual orbitals are all dominated by the bpp ligand except LUMO + 2 which is mainly populated by bpy ligand. The top two occupied orbitals of **2** are 4d(Ru) character but combined with contributions from bpp ligand (in HOMO) or from both bpp and Cl atom (in HOMO - 1). The other interested occupied orbitals HOMO - 5 and HOMO - 6 are totally localized on ligands, as shown in Table ESI-1.

For **3**, the compositions of the concerned frontier molecular orbitals are similar as those of **2**, in which the virtual orbitals are controlled by the bpp ligand while the occupied orbitals are composed by the metal and ligands.

**Table ESI-1** Frontier molecular orbital compositions for **1**, **2**, and **3**

| Complex        | Orbital        | Main Component (%) |                         |      |      |                   | Energy (eV) |       |
|----------------|----------------|--------------------|-------------------------|------|------|-------------------|-------------|-------|
|                |                | Ru                 | bpp                     | bpy  | Cl   | COOH <sup>a</sup> |             |       |
| <b>1</b>       | 137 (LUMO + 7) | 45.9               | 19.1                    | 26.3 | 8.5  | 0.2               | -0.66       |       |
|                | 133 (LUMO + 3) | 0.3                | 0.9                     | 90.6 | 0.0  | 8.2               | -2.19       |       |
|                | 131 (LUMO + 1) | 1.8                | 1.2                     | 66.7 | 0.1  | 30.2              | -2.64       |       |
|                | 130 (LUMO)     | 7.7                | 3.3                     | 73.9 | 0.2  | 14.9              | -3.13       |       |
|                |                |                    | $\Delta E(HOMO - LUMO)$ |      |      |                   |             | 2.71  |
|                | 129 (HOMO)     | 67.2               | 15.4                    | 7.5  | 9.1  | 0.8               | -5.84       |       |
|                | 128 (HOMO - 1) | 66.5               | 11.9                    | 8.6  | 13.0 | 0.1               | -6.09       |       |
|                | 127 (HOMO - 2) | 68.6               | 17.1                    | 13.0 | 0.0  | 1.3               | -6.36       |       |
|                | 123 (HOMO - 6) | 0.3                | 0.4                     | 98.4 | 0.2  | 0.6               | -7.64       |       |
|                | <b>2</b>       | 144 (LUMO + 3)     | 0.5                     | 60.7 | 1.0  | 0.1               | 37.7        | -2.53 |
|                |                | 143 (LUMO + 2)     | 5.3                     | 5.7  | 88.2 | 0.1               | 0.7         | -2.59 |
|                |                | 142 (LUMO + 1)     | 3.4                     | 72.2 | 4.2  | 0.0               | 20.2        | -2.89 |
|                |                | 141 (LUMO)         | 8.2                     | 70.8 | 2.0  | 1.0               | 18.0        | -3.27 |
|                |                |                    | $\Delta E(HOMO - LUMO)$ |      |      |                   |             | 2.76  |
| 140 (HOMO)     |                | 65.4               | 16.1                    | 6.2  | 10.1 | 2.2               | -6.03       |       |
| 139 (HOMO - 1) |                | 63.2               | 14.7                    | 6.5  | 13.9 | 1.6               | -6.26       |       |
| 135 (HOMO - 5) |                | 2.0                | 86.5                    | 0.4  | 9.9  | 1.2               | -7.55       |       |
| 134 (HOMO - 6) |                | 10.6               | 16.1                    | 9.6  | 62.7 | 1.0               | -7.67       |       |
| <b>3</b>       |                | 143 (LUMO + 2)     | 0.7                     | 61.5 | 1.1  | 0.1               | 36.6        | -2.43 |
|                | 142 (LUMO + 1) | 3.5                | 76.7                    | 2.7  | 0.0  | 17.0              | -2.80       |       |
|                | 141 (LUMO)     | 8.8                | 69.3                    | 2.1  | 0.8  | 19.0              | -3.24       |       |
|                |                |                    | $\Delta E(HOMO - LUMO)$ |      |      |                   |             | 2.74  |
|                | 140 (HOMO)     | 67.5               | 14.2                    | 6.6  | 10.7 | 0.9               | -5.98       |       |
|                | 139 (HOMO - 1) | 64.0               | 14.5                    | 6.6  | 13.1 | 1.9               | -6.20       |       |
|                | 135 (HOMO - 5) | 2.1                | 81.7                    | 0.4  | 9.9  | 5.9               | -7.59       |       |

<sup>a</sup> The COOH components are not included into the related bpp or bpy ligand.
